# Supplementary material for: Aggregation induced emission (AIE) active cross-linked poly(N-isopropyl acrylamide-co-tetra(phenyl)ethene di-acrylates): sensors for effective nitroaromatics detection in an aqueous environment
Source: Royal Society of Chemistry journal article supplement (doi:10.1039/d1tc06068f), 2022-01-01
Supplement: d1tc06068f1.pdf [file d1tc06068f1.pdf]

## ***SUPPORTING INFORMATION***

### **Aggregation induced emission (AIE) active cross-linked poly(*N*-isopropyl acrylamide-co-tetra(phenyl)ethene di-acrylates): Sensors for effective nitroaromatics detection in aqueous environment**

Feng Liu,<sup>a</sup> Yi Ren,<sup>a</sup> Hazel Lau,<sup>a</sup> Ben Zhong Tang<sup>\*b</sup> and Hui Zhou<sup>\*a</sup>

<sup>a</sup>Institute of Materials Research and Engineering, A\*STAR (Agency for Science, Technology and Research), 2 Fusionopolis Way, Innovis, #08-03, Singapore 138634, Republic of Singapore.

<sup>b</sup>Department of Chemistry, The Hong Kong University of Science & Technology, Clear Water Bay, Kowloon, Hong Kong, China.

\*Corresponding author: Hui Zhou and Ben Zhong Tang

Email address: [chmzhouh@gmail.com](mailto:chmzhouh@gmail.com); [tangbenz@ust.hk](mailto:tangbenz@ust.hk)

Mailing address: 2 Fusionopolis Way, Innovis, #08-03, Singapore 138634.

Tel: 65-6872-7543

Fax: 65-6872-7528

## Table content

**Scheme S1.** Synthetic routes of monomers (**M2**)<sup>1</sup> and corresponding cross-linked polymers (**CP1-4**). (4)

**Figure S1.** <sup>1</sup>H NMR spectrum of **CP1** in CDCl<sub>3</sub>. (4)

**Figure S2.** (a) TGA thermograms of PNIPAM and **CP1-4** recorded under nitrogen at a heating rate of 20 °C/min. (b) DSC thermograms of PNIPAM and **CP1-4** recorded under nitrogen at a heating rate of 10 °C/min. (5)

**Figure S3.** Calibration curve for determination of copolymer composition, using 4,4'-(2,2-diphenylethene-1,1-diyl)diphenol (TPE-(OH)<sub>2</sub>) as standard. [TPE-(OH)<sub>2</sub>] = 10<sup>-5</sup> to 10<sup>-4</sup> M, [PNIPAM] = 0.50 mg/mL, 20 °C. Open squares and circles are the data points for the standard and the copolymers, respectively. (5)

**Figure S4.** Fluorescence spectra of cross-linked polymers in THF/H<sub>2</sub>O mixtures (λ<sub>ex</sub> = 315 nm, [polymer] = 0.5 mg/mL, 20 °C): (a) **CP2**, (b) **CP3** and (c) **CP4**. (6)

**Figure S5.** Fluorescence spectra of linear polymers in THF/H<sub>2</sub>O mixtures (λ<sub>ex</sub> = 318 nm, [polymer] = 0.5 mg/mL, 20 °C): (a) **LP1**, (b) **LP2**, c) **LP3** and (d) **LP4**. (7)

**Figure S6.** (a) Plot of  $I/I_0$  vs temperature of **CP1**. (b) The particle size and solution turbidity (kcps) vs temperature of **CP1**. [**CP1**] = 0.5 mg/mL,  $I_0$  and  $I$  are the fluorescence intensity at 14 °C and a measured temperature, respectively. The fluorescence intensity was recorded at 461 nm; λ<sub>ex</sub> = 315 nm. (8)

**Figure S7.** Plot of fluorescence intensity vs temperature of **CP1** with different concentration in H<sub>2</sub>O. Concentration of copolymers **CP1** is 0.25, 0.50 and 1.0 mg/mL, respectively. Fluorescence was measured at 461 nm, excited at 315 nm. (8)

**Figure S8.** (A) Fluorescence spectra of 50.0 μg•mL<sup>-1</sup> **CP1** in H<sub>2</sub>O in the presence of different PA concentrations (μg•mL<sup>-1</sup>). (B) Concentration-dependent fluorescence quenching of **CP1** by PA. (9)

**Figure S9.** (A) Fluorescence spectra of 25.0 μg•mL<sup>-1</sup> **CP1** in H<sub>2</sub>O in the presence of different PA concentrations (μg•mL<sup>-1</sup>). (B) Concentration-dependent fluorescence quenching of **CP1** by PA. (9)

**Figure S10.** (A) Fluorescence spectra of 12.5 μg•mL<sup>-1</sup> **CP1** in H<sub>2</sub>O in the presence of different PA concentrations (μg•mL<sup>-1</sup>). (B) Concentration-dependent fluorescence quenching of **CP1** by PA. (10)

**Figure S11.** Fluorescence spectra of 100.0 μg•mL<sup>-1</sup> **CP2** in H<sub>2</sub>O in the presence of different PA concentrations (μg•mL<sup>-1</sup>). (B) Concentration-dependent fluorescence quenching of **CP2** by PA. (10)

**Figure S12.** Fluorescence spectra of 100.0 μg•mL<sup>-1</sup> **CP3** in H<sub>2</sub>O in the presence of different PA concentrations (μg•mL<sup>-1</sup>). (B) Concentration-dependent fluorescence quenching of **CP3** by PA. (11)

**Figure S13.** Fluorescence spectra of 100.0 μg•mL<sup>-1</sup> **CP4** in H<sub>2</sub>O in the presence of different PA concentrations (μg•mL<sup>-1</sup>). (B) Concentration-dependent fluorescence quenching of **CP4** by PA. (11)

**Table S1.** Summary of  $K_{sv}$  of CP1 on nitroaromatics detection. (12)

**Table S2.** Summary of  $K_{sv}$  of LP1 on nitroaromatics detection. (12)

**Figure S14.** The particle size vs temperature of **CP1** during the collapsing-swelling process. [**CP1**] = 0.5 mg/mL, [PA] = 0.1 mg/mL. (13)

**Table S3.** Summary for the performance of AIE polymers for explosive detection. (13)

**Figure S15.** <sup>1</sup>H NMR spectrum of monomer (**M2**). (13)

**Figure S16.** <sup>13</sup>C NMR spectrum of monomer (**M2**). (14)

|                                                                                      |                         |
|--------------------------------------------------------------------------------------|-------------------------|
| <b>Figure S17.</b> HRMS spectrum of monomer ( <b>M2</b> ).                           | (14)                    |
| <b>Figure S18.</b> FTIR spectrum of monomer ( <b>M2</b> ).                           | (15)                    |
| <b>Figure S19.</b> <sup>13</sup> C NMR spectrum of <b>CP1</b> in CDCl <sub>3</sub> . | (15) <b>Figure</b>      |
| <b>S20.</b> FTIR spectrum of <b>CP1</b> .                                            | (16) <b>Figure S21.</b> |
| <sup>1</sup> H NMR spectrum of <b>CP2</b> in CDCl <sub>3</sub> .                     | (16)                    |
| <b>Figure S22.</b> <sup>13</sup> C NMR spectrum of <b>P2</b> in CDCl <sub>3</sub> .  | (17)                    |
| <b>Figure S23.</b> FTIR spectrum of <b>CP2</b> .                                     | (17)                    |
| <b>Figure S24.</b> <sup>1</sup> H NMR spectrum of <b>CP3</b> in CDCl <sub>3</sub> .  | (18)                    |
| <b>Figure S25.</b> <sup>13</sup> C NMR spectrum of <b>CP3</b> in CDCl <sub>3</sub> . | (18)                    |
| <b>Figure S26.</b> FTIR spectrum of <b>CP3</b> .                                     | (19)                    |
| <b>Figure S27.</b> <sup>1</sup> H NMR spectrum of <b>CP4</b> in CDCl <sub>3</sub> .  | (19)                    |
| <b>Figure S28.</b> <sup>13</sup> C NMR spectrum of <b>CP4</b> in CDCl <sub>3</sub> . | (20)                    |
| <b>Figure S29.</b> FTIR spectrum of <b>CP4</b> .                                     | (20)                    |
| <b>Reference</b>                                                                     | (20)                    |

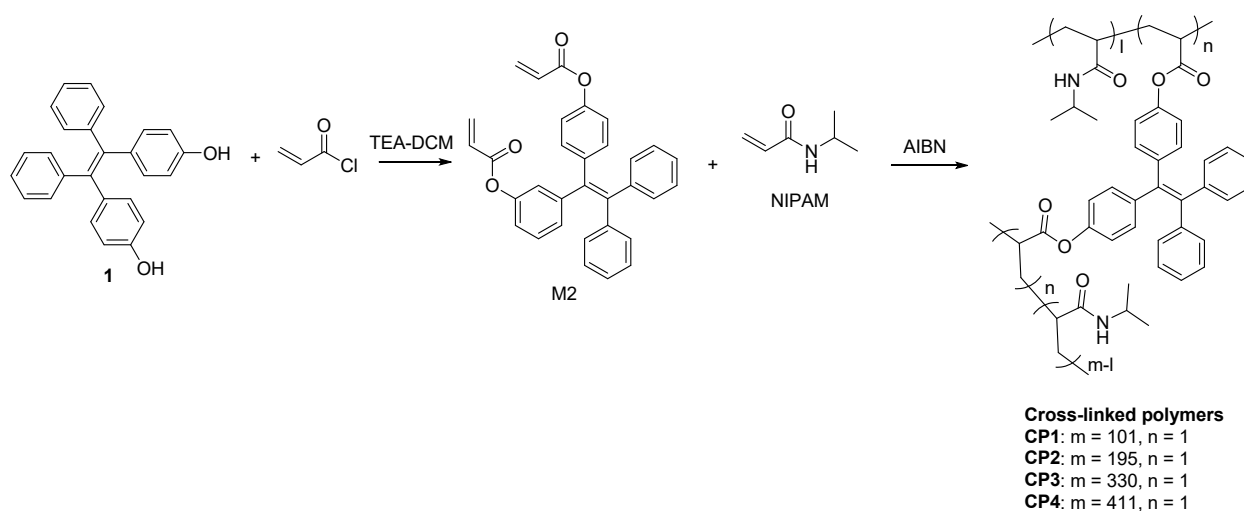

**Scheme S1.** Synthetic routes of monomers (**M2**)<sup>1</sup> and corresponding cross-linked polymers (**CP1-4**).

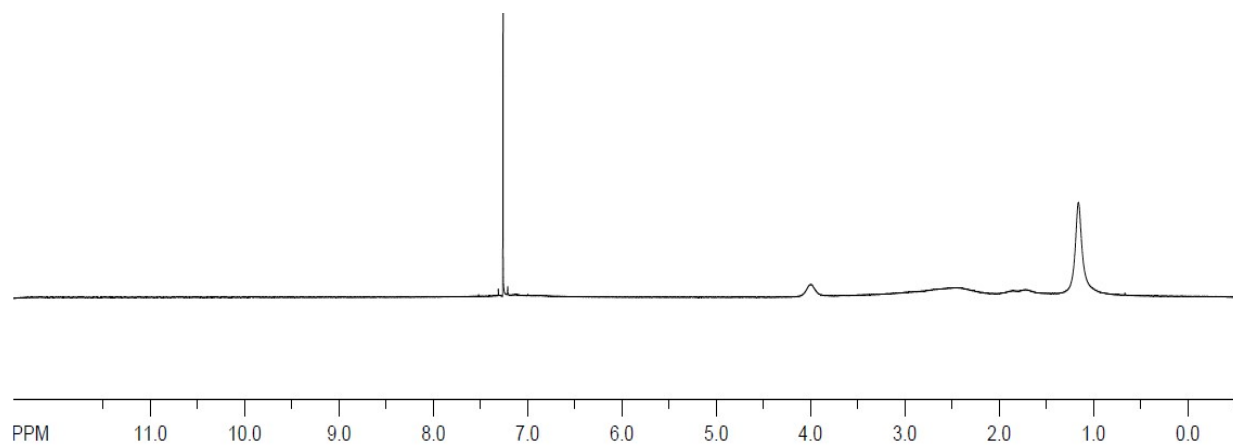

**Figure S1.** <sup>1</sup>H NMR spectrum of **CP1** in CDCl<sub>3</sub>.

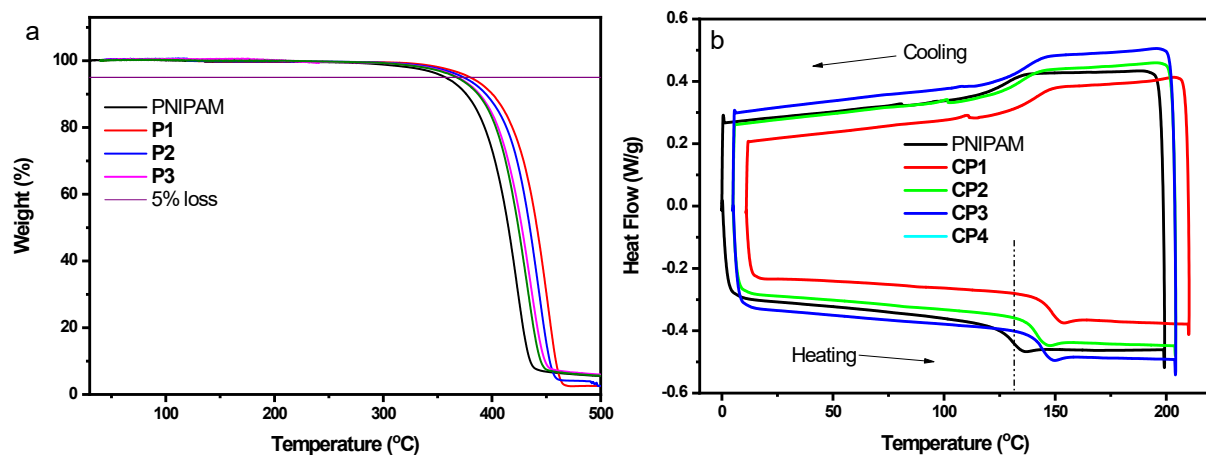

**Figure S2.** (a) TGA thermograms of PNIPAM and **CP1-4** recorded under nitrogen at a heating rate of 20 °C/min. (b) DSC thermograms of PNIPAM and **CP1-4** recorded under nitrogen at a heating rate of 10 °C/min.

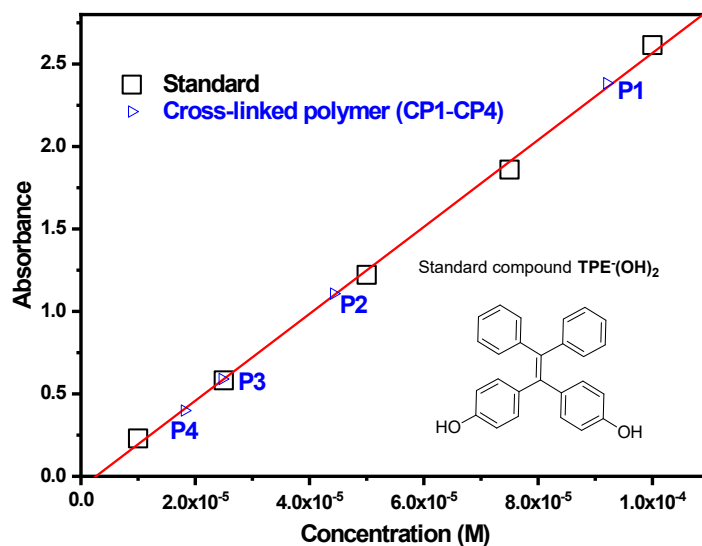

**Figure S3.** Calibration curve for determination of copolymer composition, using 4,4'-(2,2-diphenylethene-1,1-diyl)diphenol (TPE-(OH)<sub>2</sub>) as standard. [TPE-(OH)<sub>2</sub>] = 10<sup>-5</sup> to 10<sup>-4</sup> M, [PNIPAM] = 0.50 mg/mL, 20 °C. Open squares and circles are the data points for the standard and the copolymers, respectively.

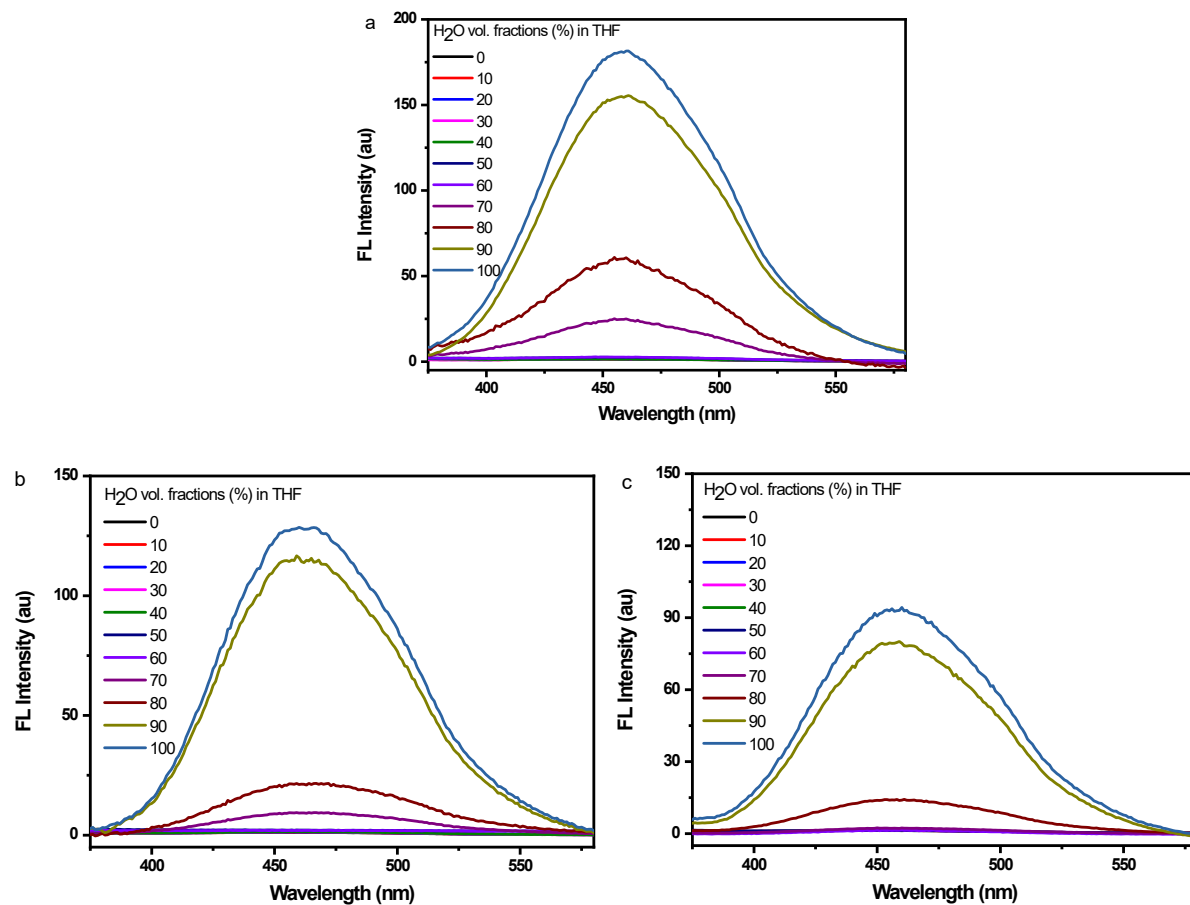

**Figure S4.** Fluorescence spectra of cross-linked polymers in THF/H<sub>2</sub>O mixtures ( $\lambda_{\text{ex}} = 315$  nm, [polymer] = 0.5 mg/mL, 20 °C): (a) **CP2**, (b) **CP3** and (c) **CP4**.

**Fi**

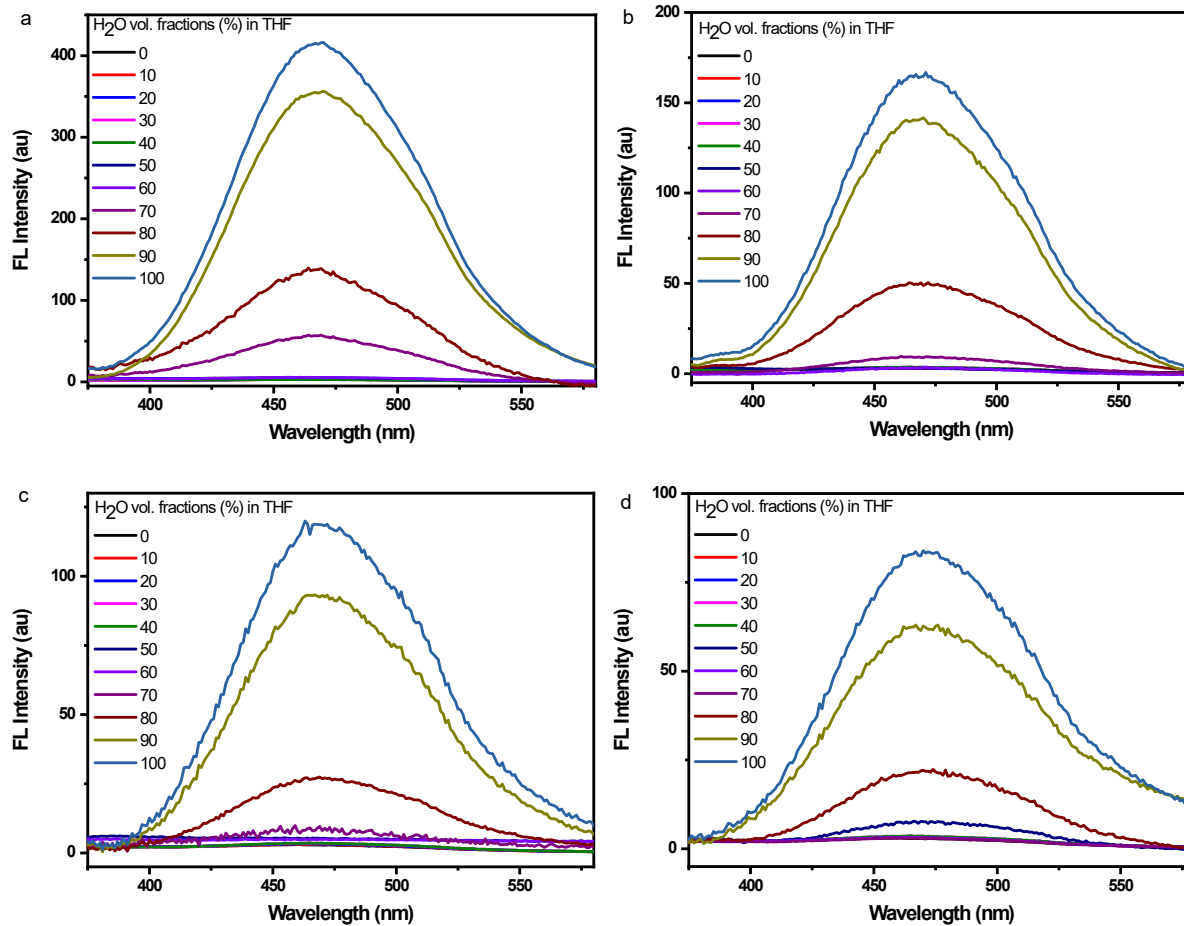

**Figure S5.** Fluorescence spectra of linear polymers in THF/H<sub>2</sub>O mixtures ( $\lambda_{\text{ex}} = 318$  nm, [polymer] = 0.5 mg/mL, 20 °C): (a) LP1, (b) LP2, c) LP3 and (d) LP4.

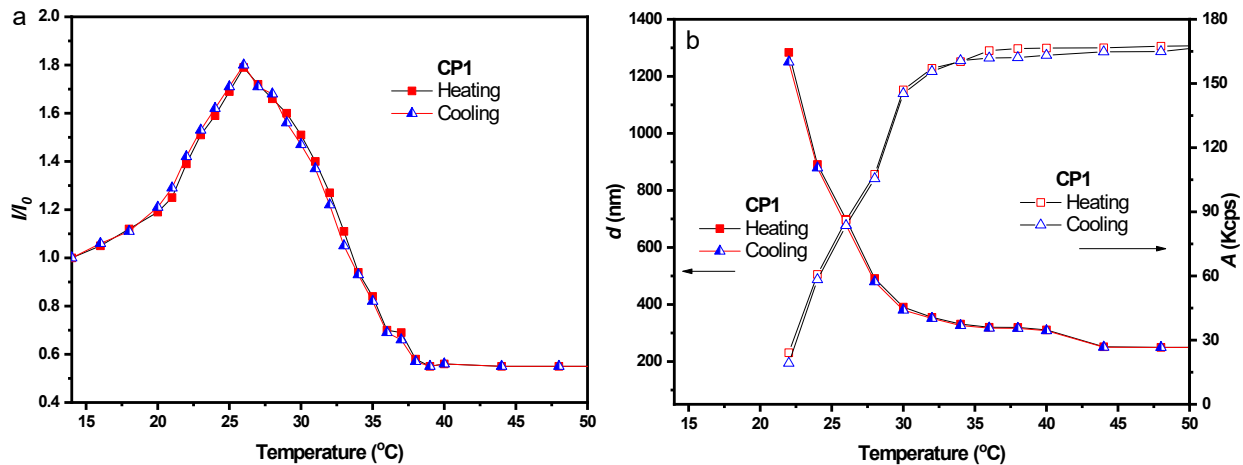

**Figure S6.** (a) Plot of  $I/I_0$  vs temperature of **CP1**. (b) The particle size and solution turbidity (kcps) vs temperature of **CP1**. [**CP1**] = 0.5 mg/mL,  $I_0$  and  $I$  are the fluorescence intensity at 14 °C and a measured temperature, respectively. The fluorescence intensity was recorded at 461 nm;  $\lambda_{\text{ex}} = 315$  nm.

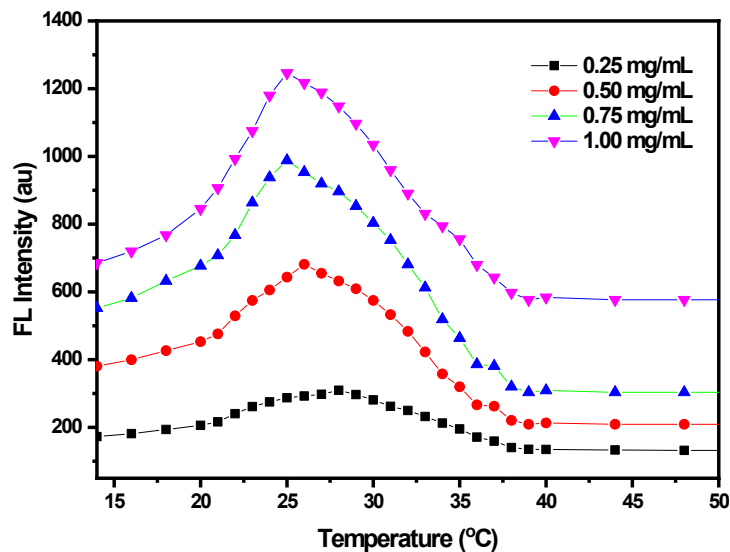

**Figure S7.** Plot of fluorescence intensity vs temperature of **CP1** with different concentration in  $\text{H}_2\text{O}$ . Concentration of copolymers **CP1** is 0.25, 0.50 and 1.0 mg/mL, respectively. Fluorescence was measured at 461 nm, excited at 315 nm.



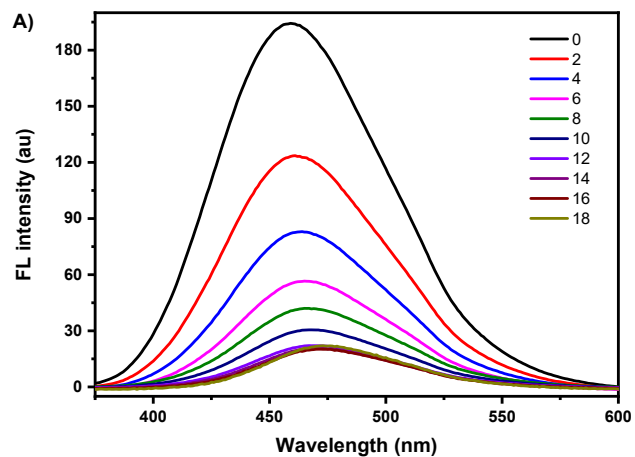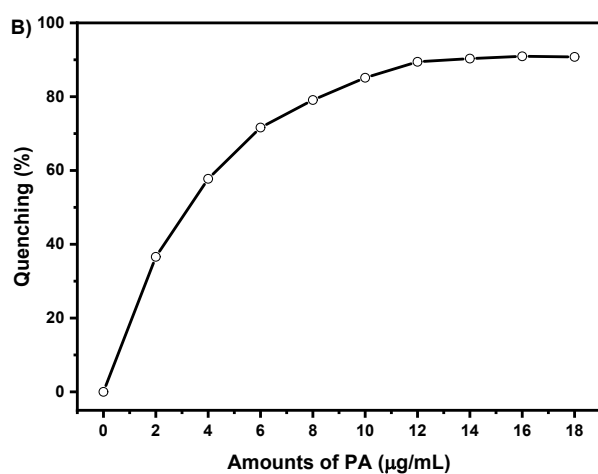

**Figure S8.** (A) Fluorescence spectra of  $50.0 \mu\text{g}\cdot\text{mL}^{-1}$  CP1 in  $\text{H}_2\text{O}$  in the presence of different PA concentrations ( $\mu\text{g}\cdot\text{mL}^{-1}$ ). (B) Concentration-dependent fluorescence quenching of CP1 by PA.

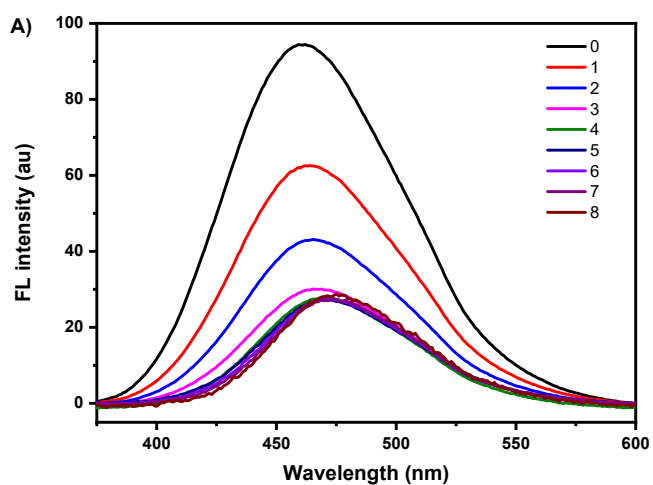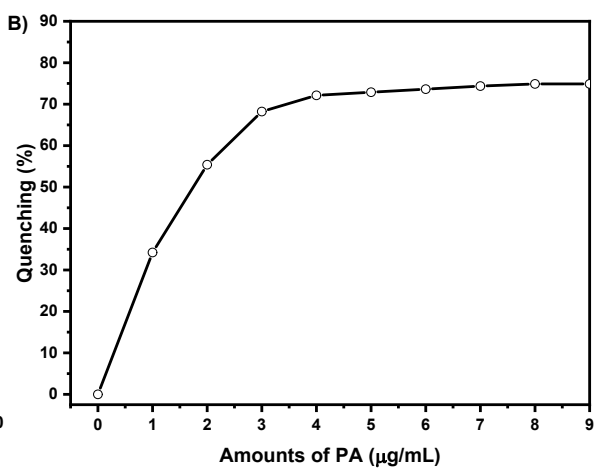

**Figure S9.** Fluorescence spectra of  $25.0 \mu\text{g}\cdot\text{mL}^{-1}$  CP1 in  $\text{H}_2\text{O}$  in the presence of different PA concentrations ( $\mu\text{g}\cdot\text{mL}^{-1}$ ). (B) Concentration-dependent fluorescence quenching of CP1 by PA.

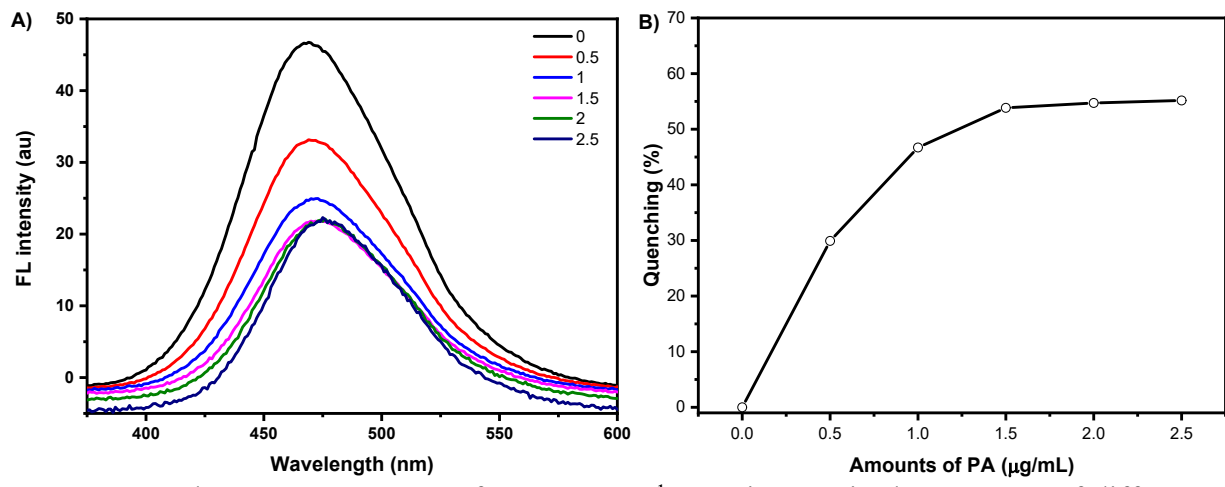

**Figure S10.** Fluorescence spectra of  $12.5 \mu\text{g}\cdot\text{mL}^{-1}$  CP1 in  $\text{H}_2\text{O}$  in the presence of different PA concentrations ( $\mu\text{g}\cdot\text{mL}^{-1}$ ). (B) Concentration-dependent fluorescence quenching of CP1 by PA.

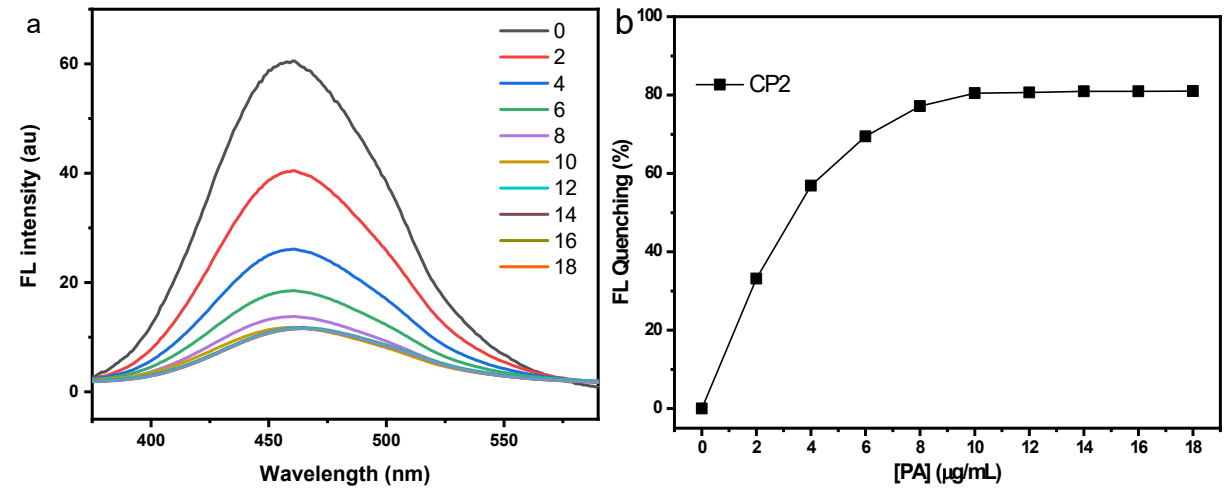

**Figure S11.** Fluorescence spectra of  $100.0 \mu\text{g}\cdot\text{mL}^{-1}$  CP2 in  $\text{H}_2\text{O}$  in the presence of different PA concentrations ( $\mu\text{g}\cdot\text{mL}^{-1}$ ). (B) Concentration-dependent fluorescence quenching of CP2 by PA.

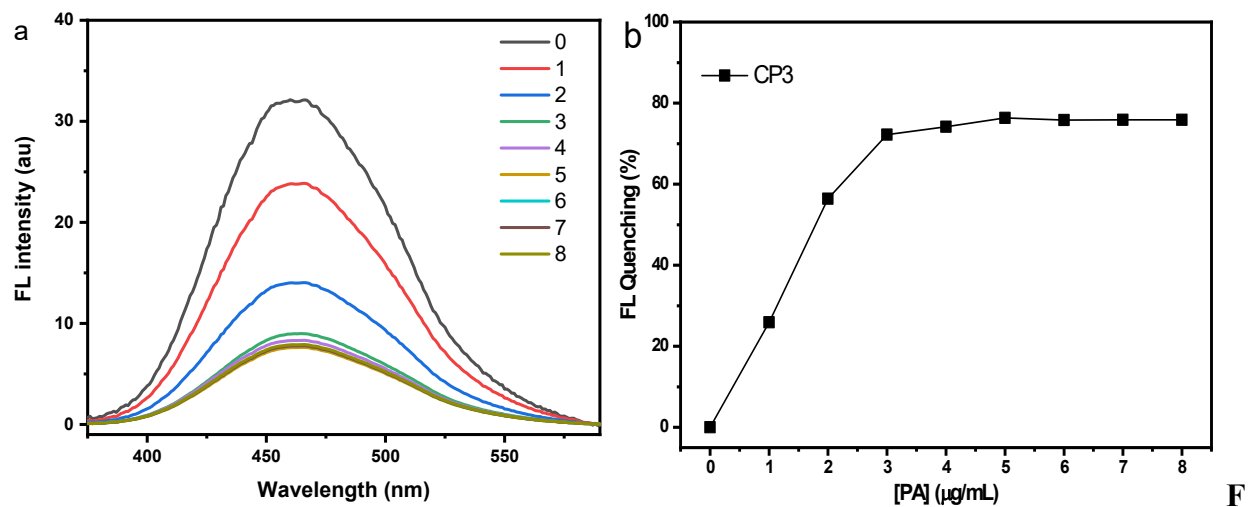

**figure S12.** Fluorescence spectra of  $100.0 \mu\text{g}\cdot\text{mL}^{-1}$  CP3 in  $\text{H}_2\text{O}$  in the presence of different PA concentrations ( $\mu\text{g}\cdot\text{mL}^{-1}$ ). (B) Concentration-dependent fluorescence quenching of CP3 by PA.

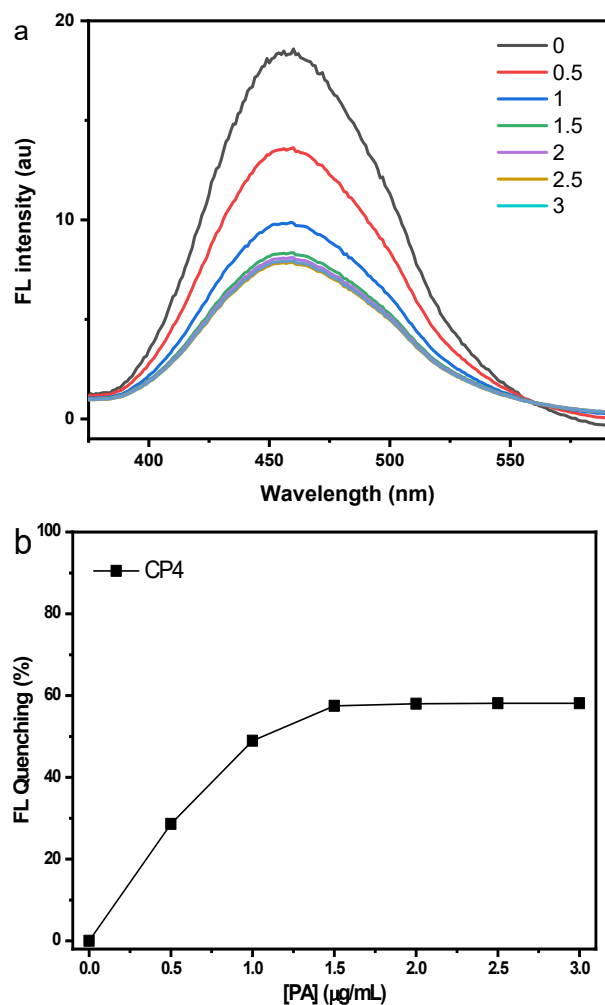

**Figure S13.** Fluorescence spectra of  $100.0 \mu\text{g}\cdot\text{mL}^{-1}$

<sup>1</sup> CP4 in H<sub>2</sub>O in the presence of different PA concentrations (μg•mL<sup>-1</sup>). (B) Concentration-dependent fluorescence quenching of CP4 by PA.

Comment [HZ]:

**Table S1.** Summary of  $K_{sv}$  of CP1 on nitroaromatics detection.

|     | $K_{sv}$ (Before collapsing-swelling process, M <sup>-1</sup> ) | Detection limit (Before collapsing-swelling process, ppm) | $K_{sv}$ (After collapsing-swelling process, M <sup>-1</sup> ) | Detection limit (After collapsing-swelling process, ppm) |
|-----|-----------------------------------------------------------------|-----------------------------------------------------------|----------------------------------------------------------------|----------------------------------------------------------|
| PA  | $3.25 \times 10^5$                                              | 6.0                                                       | $2.35 \times 10^6$                                             | 0.25                                                     |
| TNT | $2.30 \times 10^4$                                              | 12.0                                                      | $1.49 \times 10^5$                                             | 3.0                                                      |
| DNT | $1.77 \times 10^4$                                              | 14.0                                                      | $1.15 \times 10^5$                                             | 4.0                                                      |
| NT  | $1.36 \times 10^4$                                              | 14.5                                                      | $8.86 \times 10^4$                                             | 4.5                                                      |

**Table S2.** Summary of  $K_{sv}$  of LP1 on nitroaromatics detection.

|     | $K_{sv}$ (Before collapsing-swelling process, M <sup>-1</sup> ) | Detection limit (Before collapsing-swelling process, ppm) | $K_{sv}$ (After collapsing-swelling process, M <sup>-1</sup> ) | Detection limit (After collapsing-swelling process, ppm) |
|-----|-----------------------------------------------------------------|-----------------------------------------------------------|----------------------------------------------------------------|----------------------------------------------------------|
| PA  | $1.07 \times 10^5$                                              | 12.0                                                      | $5.61 \times 10^5$                                             | 3.0                                                      |
| TNT | $1.83 \times 10^4$                                              | 14.0                                                      | $1.15 \times 10^5$                                             | 3.5                                                      |
| DNT | $1.23 \times 10^4$                                              | 15.0                                                      | $8.14 \times 10^4$                                             | 4.0                                                      |
| NT  | $1.08 \times 10^4$                                              | 16.0                                                      | $5.57 \times 10^4$                                             | 4.5                                                      |

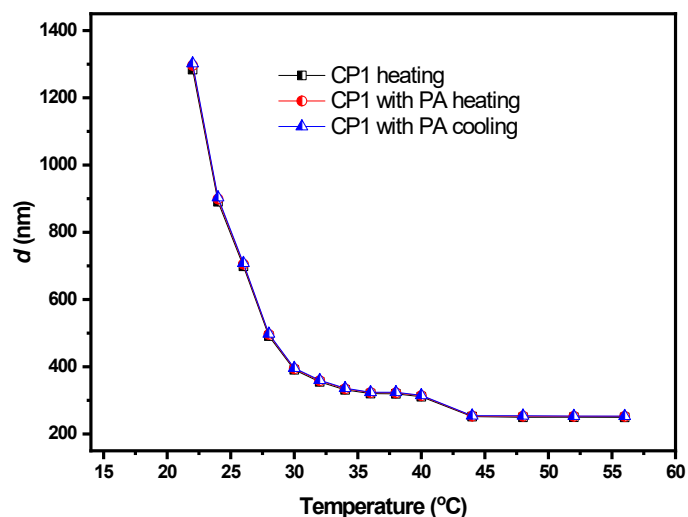

**Figure S14.** The particle size vs temperature of **CP1** with PA during the collapsing-swelling process. **[CP1]** = 0.5 mg/mL, **[PA]** = 0.1 mg/mL.

**Table S3.** Summary for the performance of AIE polymers for explosive detection.

| Polymer     | Structure of polymer          | State of analyte | Explosives/nitro-compounds | $K_{sv}$ ( $M^{-1}$ )                      | Sensitivity          |
|-------------|-------------------------------|------------------|----------------------------|--------------------------------------------|----------------------|
| <b>1</b>    | Linear conjugated             | Solution         | PA, TNT, DNT, NT           | $1.80 \times 10^5 - 3.65 \times 10^3$      | 5 ppb                |
|             |                               | Vapor            | TNT, DNT, NT               | -                                          | 5 ppb                |
| <b>2</b>    | Hyper-branched conjugated     | Solution         | PA                         | $1.67 \times 10^4$                         | 0.5 ppm              |
| <b>3</b>    | Linear non-conjugated         | Solution         | PA, TNT, NT                | $1.57 \times 10^4, 1.29 \times 10^4, 3410$ | 22.9, 22.7, 18.2 ppm |
| <b>4</b>    | Linear non-conjugated         | Vapor            | TNT, DNT, NT               | -                                          | 5 ppb, 100 ppb       |
| <b>5</b>    | Linear non-conjugated         | Solution         | PA                         | $1.60 \times 10^5$                         | 0.02 ppm             |
| <b>6</b>    | Hyper-branched non-conjugated | Solution         | PA, TNT                    | -                                          | 0.5 ppm, 1 ppm       |
|             |                               | Solid            | PA, TNT                    | -                                          | 50 ppm, 100 ppm      |
| <b>CP1*</b> | Linear non-                   | Solution         | PA, TNT, DNT, NT           | $2.35 \times 10^6$                         | 0.25 ppm             |

|  |            |  |  |  |  |
|--|------------|--|--|--|--|
|  | conjugated |  |  |  |  |
|--|------------|--|--|--|--|

\*Current work.

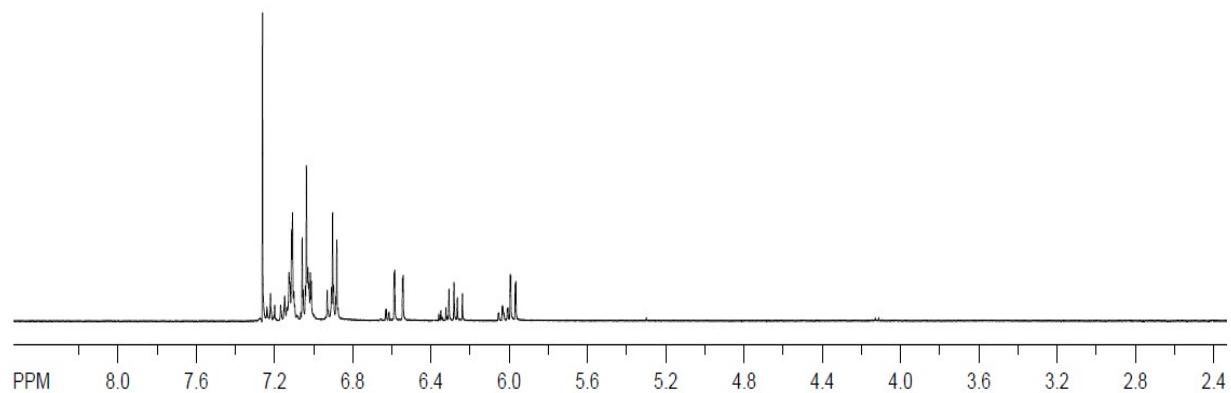

**Figure S15.** <sup>1</sup>H NMR spectrum of monomer (**M2**).

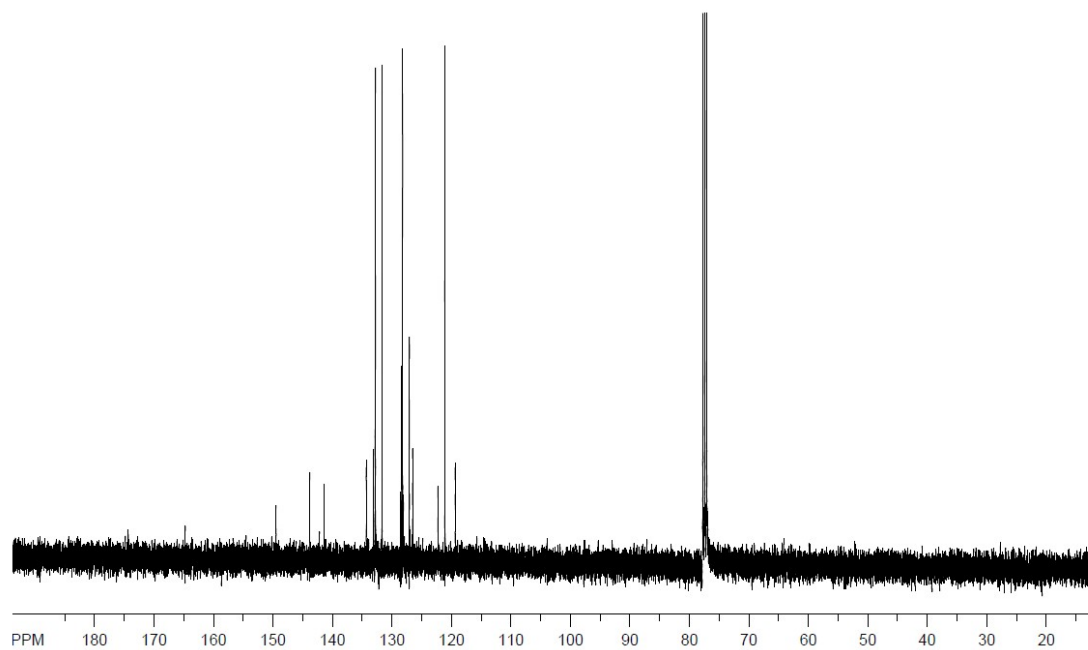

**Figure S16.** <sup>13</sup>C NMR spectrum of monomer (**M2**).

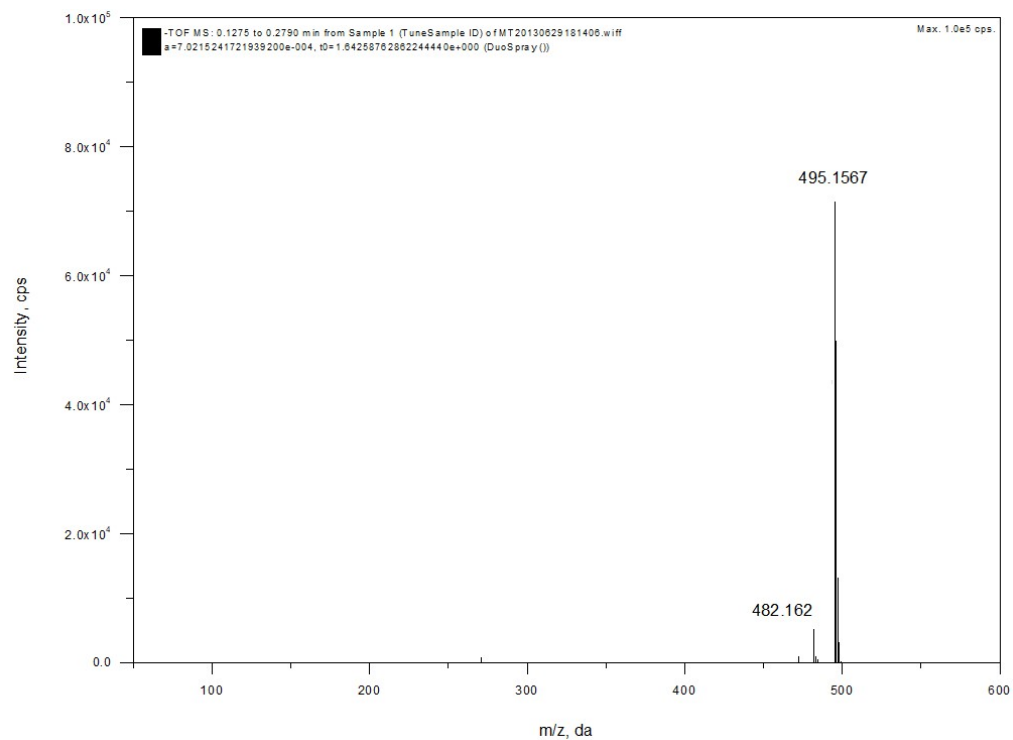

Figure S17. HRMS spectrum of monomer (M2).

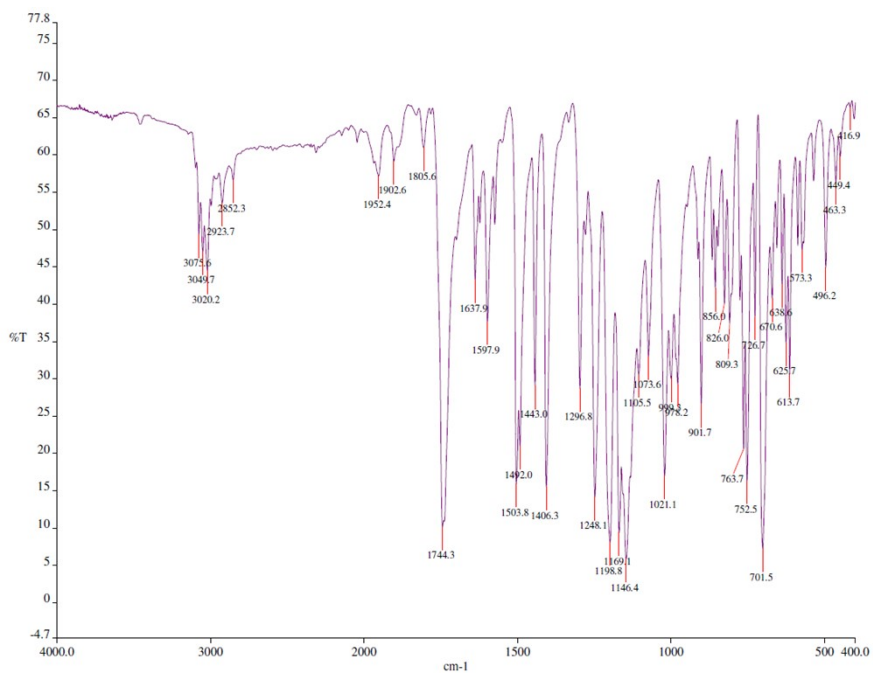

Figure S18. FTIR spectrum of monomer (M2).

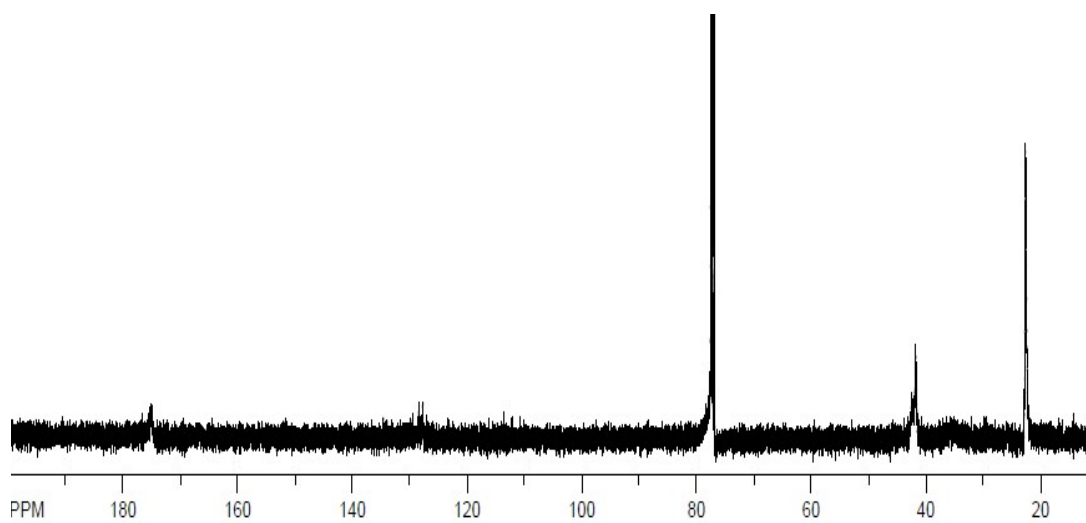

Figure S19.  $^{13}\text{C}$  NMR spectrum of CP1 in  $\text{CDCl}_3$ .

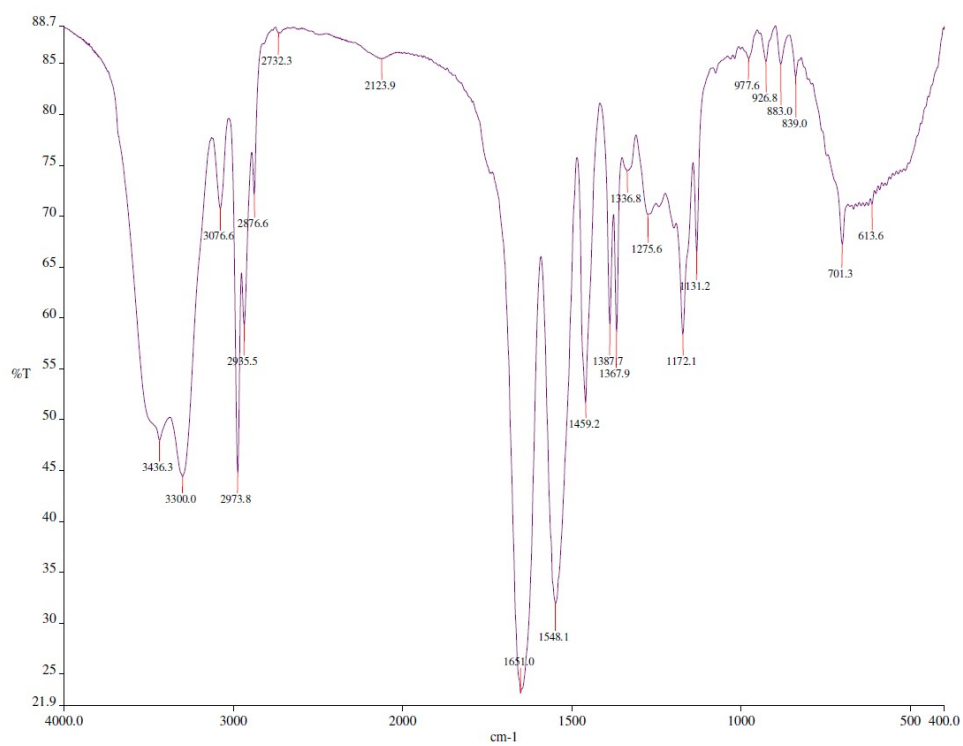

Figure S20. FTIR spectrum of CP1.



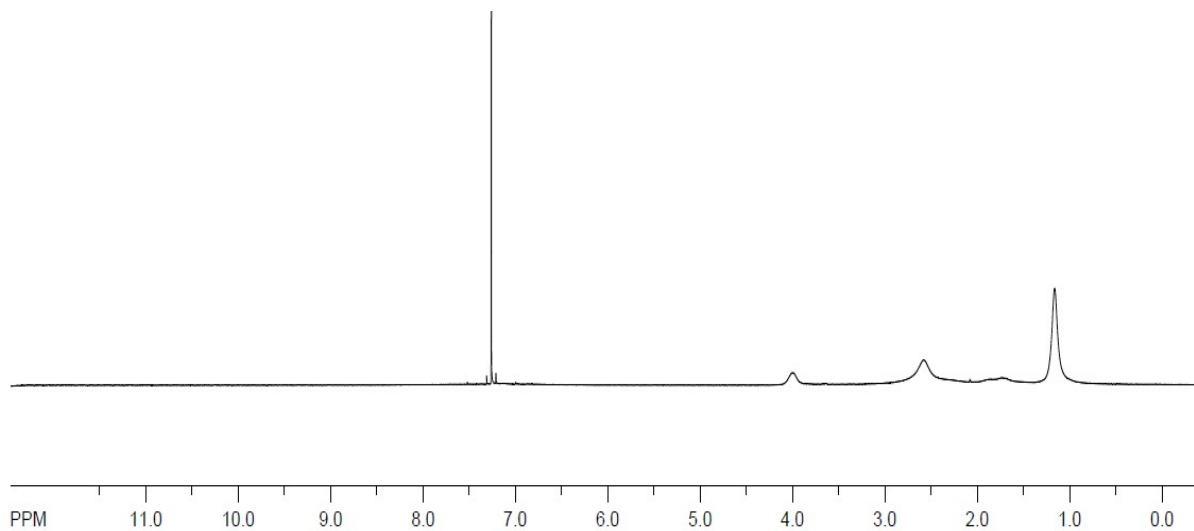

**Figure S21.**  $^1\text{H}$  NMR spectrum of **CP2** in  $\text{CDCl}_3$ .

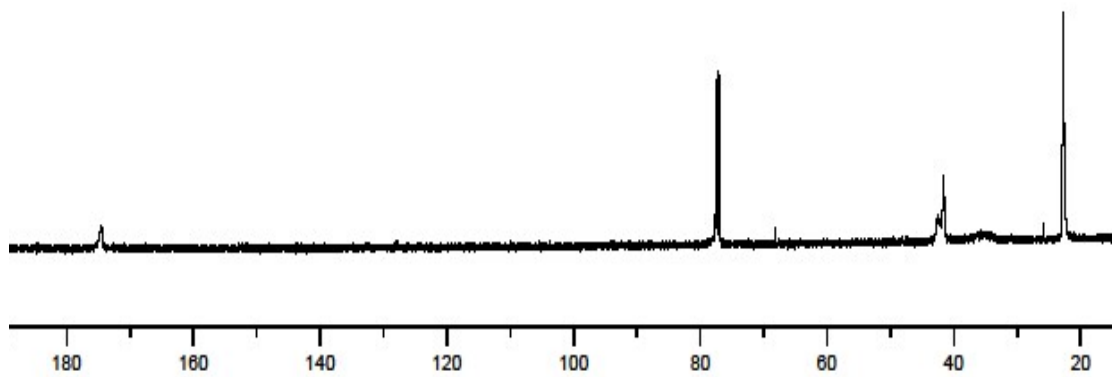

**Figure S22.**  $^{13}\text{C}$  NMR spectrum of **P2** in  $\text{CDCl}_3$ .

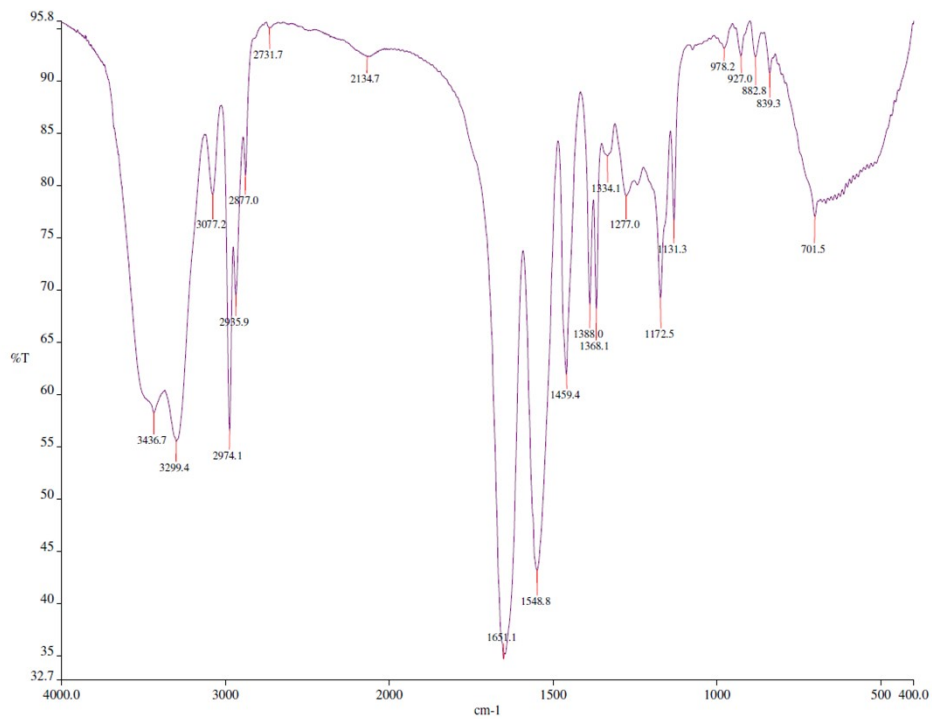

**Figure S23.** FTIR spectrum of **CP2**.

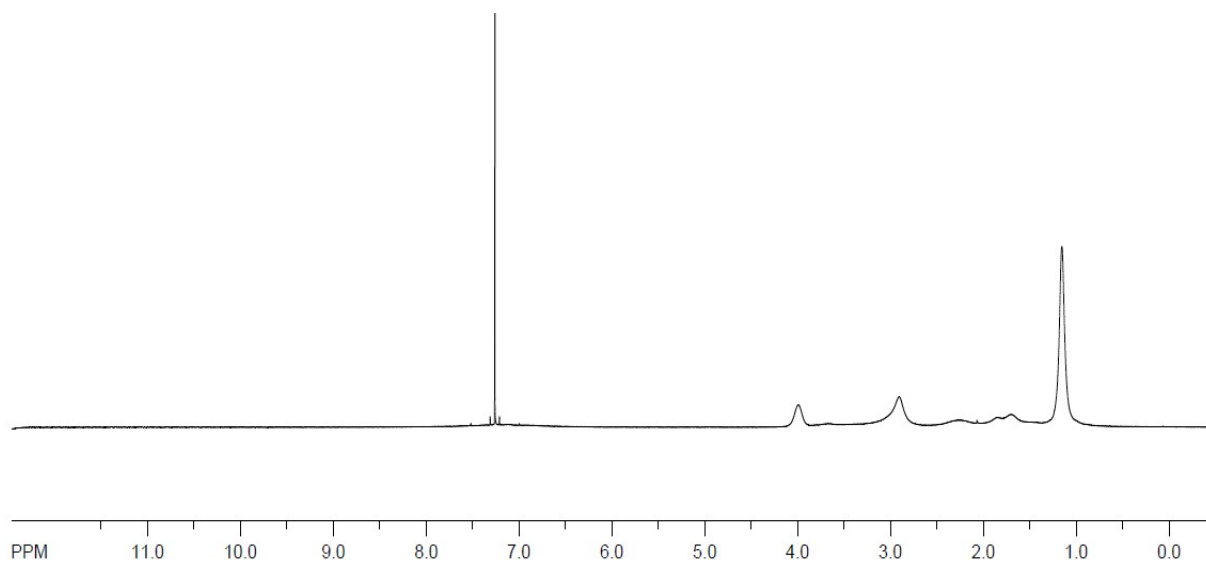

**Figure S24.** <sup>1</sup>H NMR spectrum of **CP3** in CDCl<sub>3</sub>.

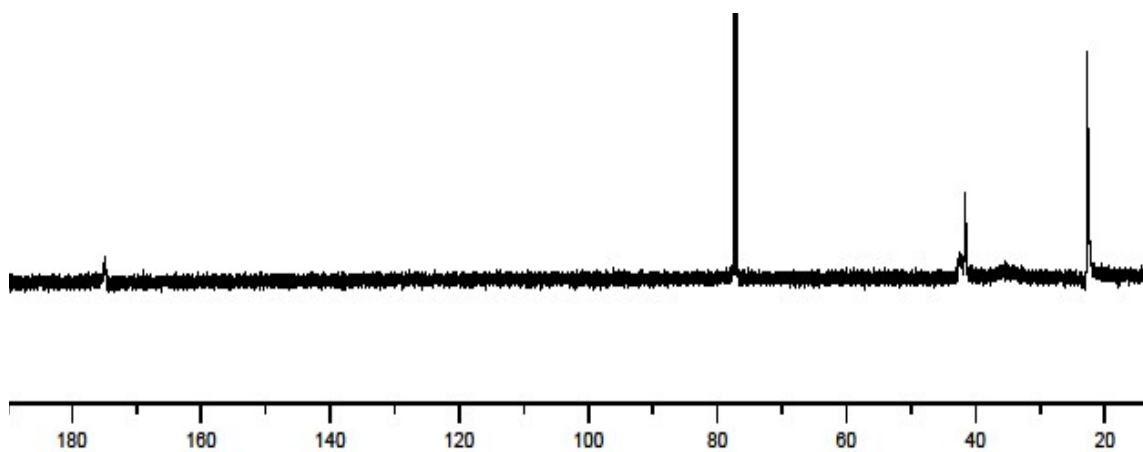

Figure S25.  $^{13}\text{C}$  NMR spectrum of **CP3** in  $\text{CDCl}_3$ .

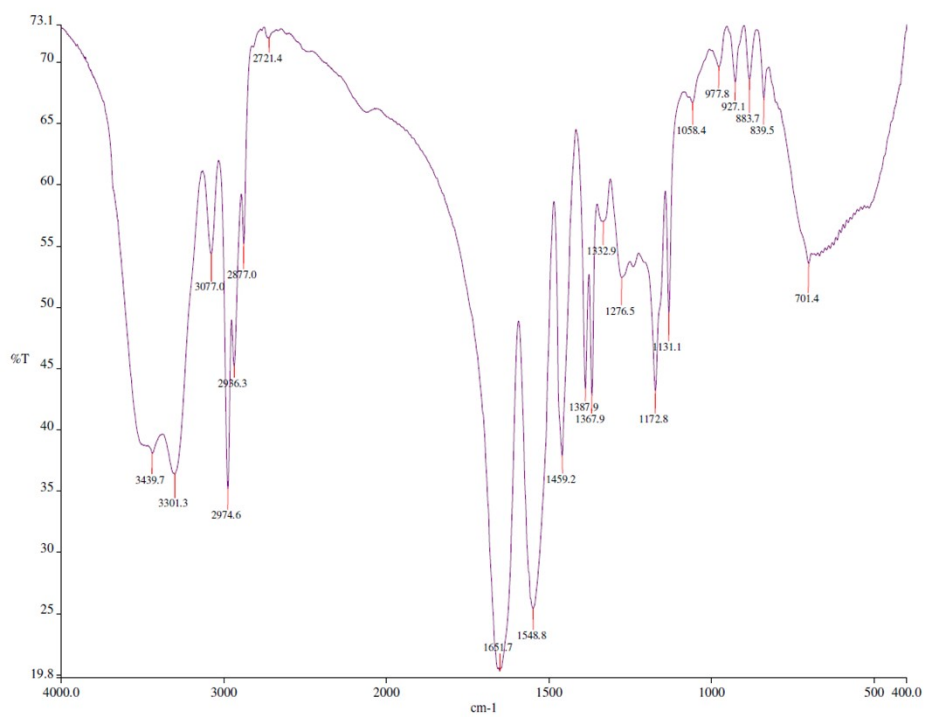

Figure S26. FTIR spectrum of **CP3**.

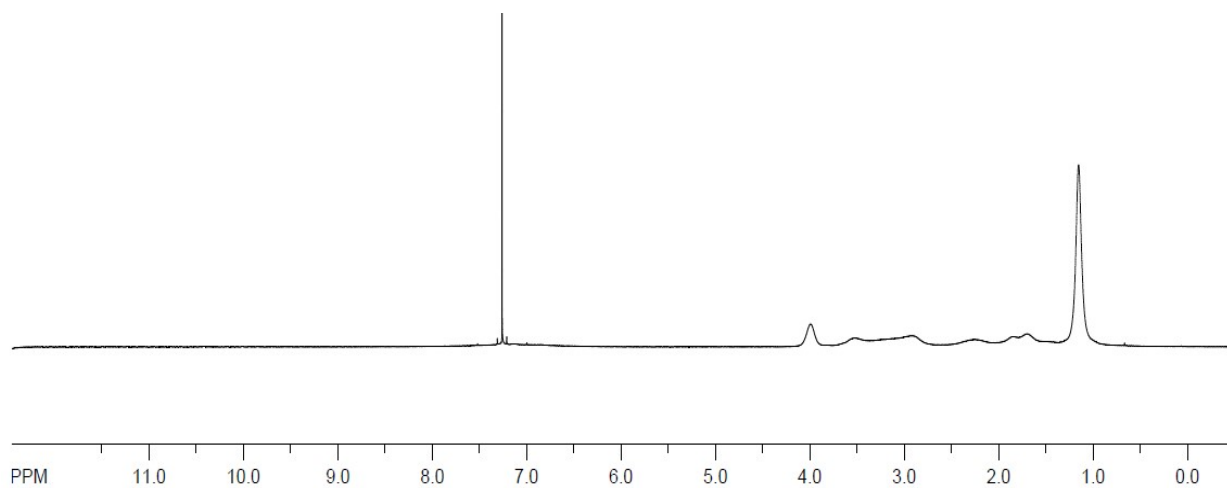

**Figure S27.** <sup>1</sup>H NMR spectrum of **CP4** in CDCl<sub>3</sub>.

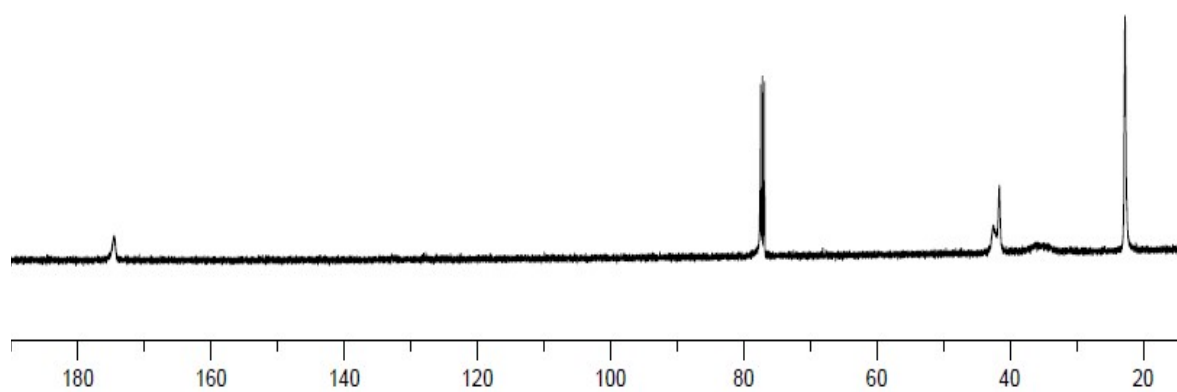

**Figure S28.** <sup>13</sup>C NMR spectrum of **CP4** in CDCl<sub>3</sub>.

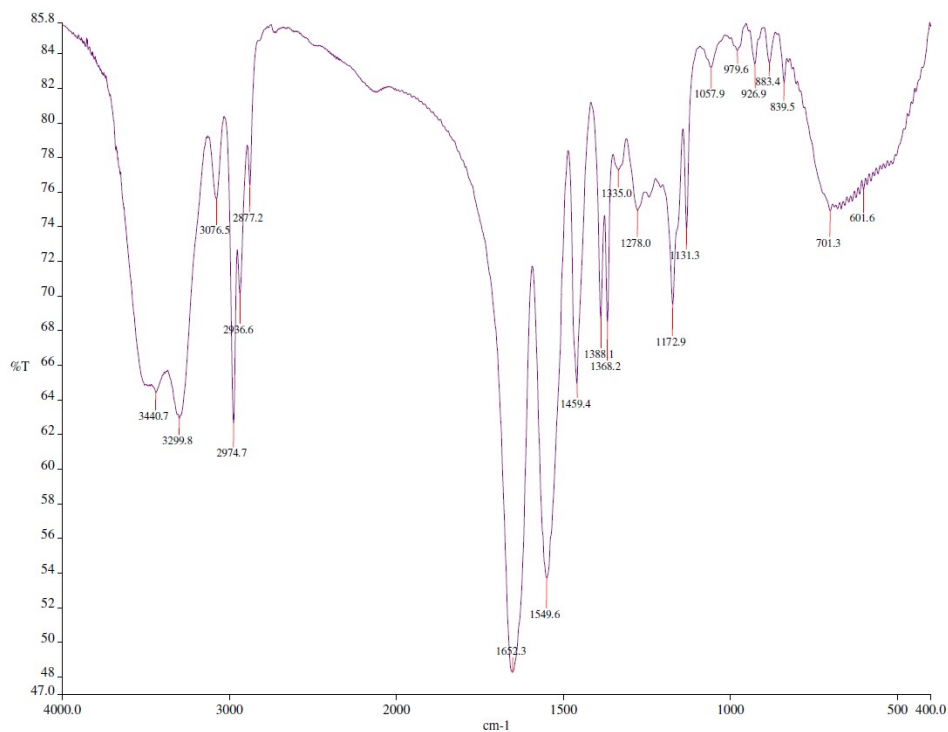

**Figure S29.** FTIR spectrum of **CP4**.

## REFERENCES

- (1) M. V. Ramakrishnam Raju, H.-C. Lin, *Org. Lett.*, 2014, **16**, 5564.
- (2) H. Zhou, X. Wang, T. T. Lin, J. Song, B. Z. Tang and J. Xu, *Polym. Chem.*, 2016, **7**, 6309–6317.
- (3) W. Z. Yuan, R. Hu, J. W. Y. Lam, N. Xie, C. K.W. Jim and B. Z. Tang, *Chem. Eur. J.*, 2012, **18**, 2847–2856.
- (4) M. H. Chua, H. Zhou, T. T. Lin, J. Wu, J. W. Xu, *J. Polym. Sci., Part A: Polym. Chem.*, 2017, **55**, 672–681.
- (5) H. Zhou, Q. Ye, W. T. Neo, J. Song, H. Yan, Y. Zong, B. Z. Tang, T. S. Andy Hor and J. Xu, *Chem. Commun.*, 2014, **50**, 13785–13788.
- (6) Q. Wang, M. Chen, B. Yao, J. Wang, J. Mei, J. Z. Sun, A. Qin, B. Z. Tang, *Macromol. Rapid Commun.*, 2013, **34**, 796–802.
- (7) X.-M. Hu, Q. Chen, D. Zhou, J. Cao, Y.-J. He and B.-H. Han, *Polym. Chem.*, 2011, **2**, 1124–1128.
